Original article

Neoadjuvant Docetaxel, Oxaliplatin, Leucovorin, and 5-Fluorouracil (FLOT)  
Versus S-1 plus Oxaliplatin (SOX) for Patients with Locally Advanced Gastric  
Cancer

<sup>\*1</sup>Birendra Kumar Sah, <sup>2</sup>Benyan Zhang, <sup>3</sup>Huan Zhang, <sup>4</sup>Jian Li, <sup>2</sup>Fei Yuan, <sup>5</sup>Tao  
Ma, <sup>5</sup>Min Shi, <sup>1</sup>Wei Xu, <sup>1</sup>Zhenglun Zhu, <sup>1</sup>Wentao Liu, <sup>1</sup>Chao Yan, <sup>\*1</sup>Chen Li,  
<sup>1</sup>Bingya Liu, <sup>1</sup>Min Yan, <sup>\*1</sup>Zhenggang Zhu

**\*Corresponding authors**

1 Department of General Surgery, Gastrointestinal Surgery Unit  
Ruijin Hospital, Shanghai Jiao Tong University School of Medicine  
Shanghai Key Laboratory of Gastric Neoplasms  
Shanghai Institute of Digestive Surgery

2 Department of Pathology  
Ruijin Hospital, Shanghai Jiao Tong University School of Medicine

3 Department of Radiology  
Ruijin Hospital, Shanghai Jiao Tong University School of Medicine

4 Clinical Research Center  
Ruijin Hospital, Shanghai Jiao Tong University School of Medicine

5 Department of Medical Oncology  
Ruijin Hospital, Shanghai Jiao Tong University School of Medicine

Running title: Neoadjuvant FLOT versus SOX for Gastric Cancer

## Abstract

**Background:** Despite growing trends of neoadjuvant chemotherapy for advanced gastric cancer, there is still no consensus of optimal regimens between East and West countries. Neoadjuvant chemotherapy with docetaxel, oxaliplatin, fluorouracil, and Leucovorin (FLOT) regimen has shown promising results in terms of pathological response and survival rate. However, S-1 plus oxaliplatin (SOX) is a more favorable chemotherapy regimen in Eastern countries. We conducted this study to evaluate the safety and efficacy of both regimens, and to explore a suitable regimen for Chinese patients.

**Methods:** Patients with locally advanced gastric cancer (LAGC) were 1 : 1 randomly assigned to receive either 4 cycles of FLOT or 3 cycles of SOX regimen before curative gastrectomy. The primary endpoint was the comparison of complete or sub-total tumor regression grading (TRG1a+TRG1b) in the primary tumor.

**Results:** Altogether 74 cases enrolled between August 2018 and March 2020. All 74 randomly assigned cases were considered as intention-to-treat (ITT) population, and the 55 patients who completed the planned chemotherapy plus surgery were considered as per protocol (PP) population. There was no significant difference in pre-treatment clinicopathological parameters between the FLOT and SOX group ( $p>0.05$ ). There was no significant difference in adverse effects or postoperative morbidity and mortality between two groups ( $p>0.05$ ). Similarly, there was no significant difference in the proportion of

tumor regression grading between the FLOT and SOX group( $p>0.05$ ). In the ITT population, complete or sub-total TRG was 20.0 % in FLOT versus 32.4 % in the SOX group ( $p>0.05$ ).

Conclusions: Our study demonstrates that FLOT and SOX regimens are similarly effective for locally advanced gastric cancer patients in terms of clinical downstaging and pathological response. Both regimens were well-tolerated in this study. A large scale phase 3 randomized controlled trial is necessary to validate this result.

Key words: Gastric cancer, neoadjuvant chemotherapy, FLOT, SOX

## Background

For locally advanced gastric cancer (LAGC), there is a positive trend of neoadjuvant chemotherapy after the milestone publication of the MAGIC trial in 2006, and recently it was even supported by clinical trials from Asian countries (1-5). Furthermore, recent studies have shown that neoadjuvant chemotherapy is well tolerated and it did not influence postoperative morbidity or mortality in gastric cancer patients (6). A large scale German study clearly showed the superiority of neoadjuvant docetaxel, oxaliplatin, fluorouracil, and leucovorin (FLOT) over epirubicin, cisplatin, and fluorouracil or capecitabine (ECF or ECX) in terms of pathological response and overall survival (7, 8). FLOT regimen is not common chemotherapy in China, however, there were published studies that show that the modified or standard FLOT regimen is safe and effective in Chinese patients (9, 10). Probably taxane-based triplet chemotherapy was considered more toxic in past, therefore doublet chemotherapy with the oral tegafur gimeracil oteracil potassium capsule (S-1) is the mainstream adjuvant chemotherapy in Asian countries and few studies suggested S-1 plus platinum-based chemotherapy as neoadjuvant chemotherapy for locally advanced gastric cancer, especially with bulky lymph nodes (11, 12, 13).

In recent years, several studies have been carried out in East Asian countries on the efficacy of perioperative chemotherapy for patients with LAGC. Among them, the preliminary results of two large scale RCT trials (RESOLVE,

RESONANCE) in China suggest that neoadjuvant SOX regimen is beneficial in terms of R0 resectability, TRG, ypTNM, pCR. And patients in the neoadjuvant chemotherapy group achieved a longer 3 years-DFS compared with the control group (14, 15). To our knowledge, there is no previous study on neoadjuvant chemotherapy for LAGC that compared the efficacy between the SOX and FLOT regimens. For patients undergoing neoadjuvant chemotherapy, the pathological response rate or tumor regression grading is considered as one of the major factors which influence the overall survival (16, 17). Therefore, the main purpose of this study is to compare the rate of postoperative tumor regression between neoadjuvant chemotherapy FLOT and SOX groups.

## **Methods**

This is an investigator-initiated, phase II, open-label, randomized controlled trial (Dragon III trial). All the patients were enrolled between August 2018 and March 2020 at Ruijin Hospital, Shanghai Jiaotong University School of Medicine. The trial is prospectively registered with ClinicalTrials.gov, number NCT03636893

### Inclusion criteria

Sex: Any

Age: 18-80 years old

Histologically confirmed adenocarcinoma

Non-obstructive tumor of the stomach or esophagogastric junction

Clinical stage: cTNM: cT3-4bN1-3M0

Performance status: Eastern Cooperative Oncology Group (ECOG  $\leq$  2)

Adequate hematological function, liver function, renal function

Adequate heart and pulmonary function

Written informed consent from the patient

#### Exclusion criteria

Acute infectious diseases

Uncontrolled systemic disease or comorbidities

Confirmed or highly suspicious distant metastases

Confirmed or highly suspicious retroperitoneal lymph node metastases

Locally invaded irresectable tumors

Recurrent gastric cancer

Second malignant disease

Prior chemo or radiotherapy

Inclusion in another clinical trial

Known contraindications or hypersensitivity to chemo agents

#### Drop out

Protocol violation

Unable to complete planned chemotherapy or surgery for any reason

Refusal to perform surgery at the same hospital

Withdrawn by the participant for any reason

#### Ethics

The study was done according to the Declaration of Helsinki and Good Clinical Practice Guidelines as defined by the International Conference on Harmonisation. The institutional review board of the Ruijin Hospital approved the study protocol and patients gave written informed consent for the planned treatment. The study was conducted and analyzed by Unit III of the Department of Gastrointestinal Surgery at the Ruijin Hospital. This study was monitored by the Clinical Research Center of the Ruijin Hospital (Official body responsible to guide and monitor all types of research in the hospital), a timely meeting was performed to check the implementation of protocol guidelines.

#### Randomization

Patients were 1:1 randomly assigned to either FLOT or SOX group. A masked statistician at the Clinical Research Center of the hospital was responsible for randomization. The randomization sequence was generated with SPSS software and labeled with random names for different groups. The assignment was made by telephone contact or text messages after the patient met the inclusion criteria and signed the informed consent.

#### Pre-treatment assessment

All patients completed all the routine tests included but not limited to the following:

1. complete blood count, liver and renal function test, clotting analysis, serum tumor biomarkers.
2. Electrocardiography, echocardiography, plain chest film.

3. Upper gastrointestinal endoscopy and biopsy for pathological diagnosis.
4. Enhanced computed tomography of the chest, abdomen, and pelvis. CT examination included arterial, venous, and portal phases. CT images consisted of transverse, sagittal, and coronary sections.
5. For suspicious distant metastases, supraclavicular lymph node or retroperitoneal lymph nodes on CT, we performed ultrasound test or magnetic resonance imaging (MRI) as appropriate
6. Patients underwent bone scintigraphy or positron emission tomography (PET) for suspicious lesions on CT examination.
7. Finally, the diagnosis of peritoneal metastases was done by exploratory laparoscopy.
8. For clinical staging of the disease, we followed the eighth edition of tumor–node–metastasis (TNM) classification, issued by International Union against Cancer (UICC)

#### Neoadjuvant Chemotherapy

Patients were transferred to the Department of Medical Oncology for chemotherapy, a standard protocol for chemotherapy was circulated and timely inspection was performed by the investigators and members from Clinical Research Center to evaluate the implementation of the protocol. Antiemetic drugs with dexamethasone were routinely administered intravenously before chemotherapy. Other supportive drugs including granulocyte-colony stimulating-factor were given for treatment purposes only.



Surgical intervention was allowed for an emergency, e.g. acute upper gastrointestinal bleeding or perforation.

Patients in the FLOT group received four cycles of standard FLOT chemotherapy(7) and the patients in the SOX group received three cycles of S-1 plus oxaliplatin before curative gastrectomy.

A cycle of FLOT chemotherapy consists of :

Day 1: Intravenous 5- Fluorouracil(5-FU) 2600mg/ m<sup>2</sup> via peripherally inserted central catheter (PICC) continued for 24 hour

Intravenous leucovorin 200mg/M2

Intravenous oxaliplatin 85mg/ M2

Intravenous docetaxel 50mg/M2

Next chemotherapy cycle was repeated on 15th day

A cycle of SOX chemotherapy consists of :

Day 1: Intravenous oxaliplatin 130mg/ m<sup>2</sup>

Day 1-14: Oral tegafur gimeracil oteracil potassium capsule(S-1) 80mg/ m<sup>2</sup> twice/day

The next chemotherapy was repeated on the 21st day.

#### Evaluation of adverse effects

Adverse effects were recorded according to the National Cancer Institute Common Terminology Criteria for Adverse Events (CTCAE 4.0). Drug dose or timing was adjusted for the patients with grade three and above adverse effects. Patients with progressive disease were allowed for the alteration of

treatment. Patients were allowed to withdraw from the study for any reason.

### Tumor restaging

Radiologists followed the guidelines of Response Evaluation Criteria in Solid Tumors (RECIST version 1.1) for comparison of radiological response to neoadjuvant chemotherapy (18). Two specialized radiologists independently evaluated the response rate, the final result was obtained after reviewing both results.

### Surgery

Patients underwent surgical resection between two to four weeks after completion of neoadjuvant chemotherapy. An exploratory laparoscopy was routinely performed to rule out peritoneal or distant metastases. Only the specialist surgeons for gastric cancer were allowed to perform the surgery, and all surgeons were fully aware of the study protocol. Partial or total gastrectomy with D2 lymphadenectomy was performed according to the criteria of Japanese gastric cancer treatment guidelines(19). Patients with adjacent involved organs underwent combined resection along with gastrectomy. Combined resection was allowed only if R0 resection could be achieved. Distal gastrectomy with Billroth I gastrodudenostomy or Billroth II gastrojejunostomy with Braun anastomosis or Uncut Roux-en-Y gastrojejunostomy or Roux-en-Y gastrojejunostomy was performed for the tumors located at antrum or lower part of the stomach body. Total gastrectomy with Roux-en-Y esophagojejunostomy was performed for the proximal or large tumors at the

body of the stomach. The extent of the surgery was documented to state whether the procedure was curative or non-curative intent according to the definition stated in Japanese gastric cancer treatment guidelines(19).

### Pathological assessment

Pathologists were masked for the allocation types of neoadjuvant chemotherapies. After formalin fixation and paraffin embedding, pathologists performed an immunohistochemical examination of all resected specimens. The routine examination included for types of tumor, depth of tumor invasion, involved lymph nodes, resection margins, invasion of nerve, lymphatic, or blood vessel. Resection or R status nominated for curative resection(R0) or non-curative resection(R1 andR2). Pathological examinations also included the following: measurement of the macroscopically identifiable residual tumor and/or scarring indicating the site of the previous tumor bed. Two specialized pathologists followed the Becker criteria for the tumor regression grading (TRG) (16). Any conflicting results were settled after re-examination and discussion among both pathologists and investigators.

Tumor regression grade (TRG), Becker criteria

“Grade 1a: Complete tumor regression: 0% residual tumor per tumor bed

Grade 1b: Subtotal tumor regression: <10% residual tumor per tumor bed

Grade 2: Partial tumor regression: 10-50% residual tumor per tumor bed

Grade 3: Minimal or no tumor regression: >50% residual tumor per tumor bed”

Primary endpoints

Total percentage of patients with pathological complete tumor regression (TRG1a) and sub-total tumor regression (TRG1b) in the primary tumor

### Sample size

This is an exploratory study. The sample size was estimated empirically. Data analysis cut off time was set after surgery of the 55<sup>th</sup> patient, who met the criteria for per-protocol (PP) analysis.

### **Statistical analysis**

The primary endpoint was analyzed in the intention- to- treat (ITT) population, defined as all the patients who were randomly assigned to a treatment. Postoperative morbidity and mortality were analyzed in the per-protocol (PP) population, which is the number of patients who had surgery after completion of all planned neoadjuvant chemotherapy. Comparisons of other factors except primary endpoint were posthoc analyses. The statistical analysis was performed with Statistical Package for Social Science (SPSS) version 22.0 for Windows (SPSS, Inc., Chicago, Illinois). Nonparametric methods were used to test the data with an abnormal distribution. The continuous data are described as median and range. The categorical data are expressed as frequency and rate. A chi-square test or Fisher's exact test was used to compare the differences in rate between the two groups. All p-values presented are two-sided, a  $p$ -value less than 0.05 was considered statistically significant.

### **Results**

Altogether 74 patients (40 patients in the FLOT group and 34 patients in the SOX group) were enrolled. Nine cases in the FLOT group and ten cases in the SOX group were dropped out for different reasons (Fig.1). Finally, 55 cases completed the planned chemotherapy and underwent surgical resection. All 74 randomly assigned cases were considered as the intention-to-treat (ITT) population and 55 patients who had surgery were considered as per protocol (PP) population.

#### Clinical demographic

There was no significant difference in all clinical parameters between FLOT and SOX groups including age, sex, BMI (Table 1,  $p>0.05$ ). There was no significant difference in terms of location of the tumor, types of resection. 32.3 % of patients in the FLOT group and 33.4% of patients in the SOX group had tumors in the proximal site of the stomach. All patients underwent D2 lymphadenectomy, 58.1 % of patients in FLOT, and 62.5% in the SOX group underwent total gastrectomy (Table 1). One patient in each group underwent pancreatoduodenectomy due to local invasion.

#### Adverse effects

All patients completed 3 cycles of neoadjuvant chemotherapy in the SOX group and 4 cycles of chemotherapy in the FLOT group before surgery. There was no significant difference in chemotherapy-related hematological or non-hematological adverse effects between the two groups (Table 2,  $p>0.05$ ). Most of the hematological or non-hematological adverse events were below

grade 3. Nine versus five events of hematological grade 3-4 adverse events were observed in FLOT and SOX group respectively (Table 2).

#### Radiological response

There was no significant difference in the pre-treatment cTNM stage between FLOT and SOX groups (Table 3). 41.9 % versus 37.5 % cases were diagnosed as stage IVa in FLOT and SOX group respectively. There was no significant difference concerning the radiological response rate between the two groups. In ITT population, the disease control rate (PR+SD) rate was comparable between FLOT (75.0%) and SOX group (67.6%), overall response rate (ORR) was 55.0% in FLOT group versus 41.2% in SOX group (Table 3,  $p > 0.05$ ).

#### Pathological response

Among the PP population, there was no significant difference in any pathological parameters (Table 4,  $p > 0.05$ ). Patients in both groups had favorable margin free resection, 87.1 % in FLOT group, and 100.0 % in the SOX group. Lauren's classification shows that 58.1 % in the FLOT group and 54.2 % in the SOX group were Intestinal types. The proportion of T4a tumor and N2 lymph node was relatively higher in FLOT group comparing to SOX group, a greater portion of postoperative stage III tumor (ypTNM) was observed in FLOT group than SOX group (54.8 % versus 45.8 %), but there was no significant difference between two groups. Overall pathological response (TRG grade 1a+1b+2) rate was 67.7 % in FLOT versus 75 % in the

SOX group (Table 4,  $p>0.05$ ). In the ITT population, the complete or sub-total TRG was 20 % in the FLOT group and 32.4 % in the SOX group, yet there was no significant difference between the two groups ( $p>0.05$ ).

#### Postoperative morbidity

There was no significant difference in the postoperative stay at the hospital between FLOT and SOX groups, the median length of stay was 9 days in both groups. There was no significant difference in overall postoperative morbidity between the two groups (Table 5,  $p>0.05$ ). Two (6.5 %) anastomotic leakage was observed in the FLOT group and 1(4.2 %) in the SOX group. One patient underwent reoperation for intrabdominal hemorrhage in the SOX group. There was no death due to postoperative complications in any group.

#### Discussion

Initial reports on the FLOT 4 trial showed that 37% of patients in the FLOT group versus 23% in ECF/ECX achieved complete or sub-total tumor regression after neoadjuvant chemotherapy(7). Further results on survival revealed that the patients in the FLOT group had an overall survival of 50 months versus 35 months in ECF/ECX(8). Recent small scale studies from China also suggested that the FLOT was safe and feasible in Chinese patients(9,10). A propensity-score-matched retrospective study from China also suggested that the patients with neoadjuvant FLOT had improved overall survival compared with surgery first (20). The results of these studies suggested that the FLOT was beneficial to locally advanced gastric cancer in

terms of pathological regression and survival. However, a combination of fluorouracil and platinum chemo agents e.g. SOX or XELOX regimens are commonly used as neoadjuvant chemotherapy in Eastern Asia including Japan (11-13). Preliminary results of two large scale RCTs from China ( RESOLVE and RESONANCE ) further concluded that SOX is beneficial for LAGC (14, 15). As a result, some controversy remains whether the FLOT regimen is similarly beneficial in East Asian patients. Whether there are any differences between the triplet and the doublet chemo agents in terms of adverse effects and survival benefit. In our study, we investigated neoadjuvant FLOT and SOX for patients with LAGC, in an attempt to compare the adverse effects and postoperative pathological response between the two groups. Although the sample size is not large enough, to our knowledge this may be the first head-to-head comparative study of FLOT and SOX as neoadjuvant chemotherapy for LAGC. The higher proportion of complete or sub-total TRG in the SOX group cannot claim superiority over the FLOT group because there was no significant difference in terms of statistical calculation. However, at the very least the result of this study urges for the need for further large scale multicenter randomized trials. And our result perhaps gives some insights for further trials.

There was no difference in FLOT and SOX group in terms of adverse effects and postoperative morbidity. Thus, this study further validated our previous study that neoadjuvant chemotherapy with the FLOT regimen is safe



in Chinese patients (10). In this study, the demographic data shows that patients in both groups were well balanced by randomized assignment. The univariate analysis of the whole data suggested that TRG was associated with sex, nerve invasion, vessel invasion, and postoperative pathological stage. But there was no difference between any of these factors between the two groups (Table 4). These data suggest that these known factors which might have a role for a pathological response did not influence the result of this study.

There was a conflicting result of the radiological response rate with that of pathological results, which shows that a greater proportion of ORR was seen in the FLOT group comparing to the SOX group, although there was no statistically significant difference. We therefore further analyzed the data according to the stratification of pretreatment clinical staging and postoperative pathological TNM staging. The proportion of complete or sub-total TRG was higher in the SOX group, but there was no significant difference compared to the FLOT regimen (Table 6).

Approximately 37 % of patients achieved complete or sub-total TRG in FLOT4 trial(7), but only 20% of patients achieved complete or sub-total TRG in the FLOT group of our study. Even if we do not compare the result with the SOX group, this result shows that the proportion of complete or sub-total TRG was less than the result of the FLOT4 trial. We may assume hypothetically that the heterogeneity was caused by the racial biological difference, and maybe the FLOT regimen was not that effective in Chinese patients as it reported in

German patients. But it needs concrete data to support this hypothesis. In contrary to that the complete or sub-total TRG in the SOX group was 32.4 %, which was comparable to the result of FLOT chemotherapy in FLOT4 trial(7).

We did not calculate the sample number because there was no good quality paper on tumor regression grading of SOX regimen, we only had the results of the FLOT4 trial. Probably this was the most important demerit of this study. The number of participants was empirically estimated to obtain preliminary results, and initially, 60 patients were expected to get enrolled for the analysis but there were a substantial number of drop-out cases. Because the primary endpoint of our study was to compare the pathological regression, the cut off time for data analysis was set after surgery of the 55<sup>th</sup> patient. This cut-off time was set after discussion among investigators and statisticians, without knowing the pathological results. Besides, the results of DFS and OS are still awaited, which will provide further insight into these findings. Of course, further multicenter RCT studies are necessary to elaborate on the differences between FLOT and SOX regimens as neoadjuvant chemotherapy for patients with LAGC in terms of overall survival.

## **Conclusion**

Our study demonstrates that FLOT and SOX regimens are similarly effective for locally advanced gastric cancer patients in terms of clinical downstaging and pathological response. There was no significant difference in adverse effects and postoperative morbidity between the two groups. The result for

disease-free survival and overall survival are still awaited. A large scale phase 3 multicenter randomized controlled trial is necessary for the validation of this result.

## References

1. Cunningham D, Allum WH, Stenning SP, Thompson JN, Van de Velde CJ, et al. Perioperative Chemotherapy versus Surgery Alone for Resectable Gastroesophageal Cancer. *N Engl J Med*. 2006; 355:11-20.
2. Li W, Qin J, Sun YH, Liu TS. Neoadjuvant chemotherapy for advanced gastric cancer: a meta-analysis. *World J Gastroenterol*. 2010 Nov 28;16(44):5621-8.
3. Ronellenfitsch U, Schwarzbach M, Hofheinz R, Kienle P, Kieser M, et al. Perioperative chemo(radio)therapy versus primary surgery for resectable adenocarcinoma of the stomach, gastroesophageal junction, and lower esophagus. *Cochrane Database Syst Rev*. 2013 May 31;(5):CD008107.
4. Zhao JH, Gao P, Song YX, Sun JX, Chen XW, et al. Which is better for gastric cancer patients, perioperative or adjuvant chemotherapy: a meta-analysis. *BMC Cancer*. 2016 Aug 12; 16:631.
5. Eto K, Hiki N, Kumagai K, Shoji Y, Tsuda Y, et al. Prophylactic effect of neoadjuvant chemotherapy in gastric cancer patients with postoperative complications. *Gastric Cancer*. 2018 Jul; 21(4):703-709.
6. Hiroshi Katayama, Akira Tsuburaya, Junki Mizusawa, Kenichi Nakamura, Hitoshi Katai, et al. An Integrated Analysis of Two Phase II Trials (JCOG0001 and JCOG0405) of Preoperative Chemotherapy Followed by D3 Gastrectomy for Gastric Cancer With Extensive Lymph Node Metastasis. *Gastric Cancer*. 2019 Nov;22(6):1301-1307

7. Al-Batran SE, Hofheinz RD, Pauligk C, Kopp HG, Haag GM, et al. Histopathological regression after neoadjuvant docetaxel, oxaliplatin, fluorouracil, and leucovorin versus epirubicin, cisplatin, and fluorouracil or capecitabine in patients with resectable gastric or gastro-oesophageal junction adenocarcinoma (FLOT4-AIO). *Lancet Oncol.* 2016 Dec; 17(12):1697-1708
8. Al-Batran SE, Homann N, Pauligk C, Goetze TO, Meiler J, et al. Perioperative chemotherapy with fluorouracil plus leucovorin, oxaliplatin, and docetaxel versus fluorouracil or capecitabine plus cisplatin and epirubicin for locally advanced, resectable gastric or gastro-oesophageal junction adenocarcinoma (FLOT4): a randomised, phase 2/3 trial. *Lancet.* 2019 May 11; 393(10184):1948-1957.
9. Zhou CF, Ma T, Shi M, Xi WQ, Wu JW, Yang C, et al. Dose-finding study of modified FLOT (mFLOT) regimen as first-line treatment in Chinese patients with metastatic adenocarcinoma of stomach. *Cancer Chemotherapy and Pharmacology* (2020) 85:113–119
10. Sah BK, Zhang BY, Zhang H, Yan C, Li C, et al. Neoadjuvant chemotherapy with fluorouracil plus leucovorin, oxaliplatin, and docetaxel (FLOT) for gastric cancer patients in China. medRxiv 2020.05.22.20110668; doi: <https://doi.org/10.1101/2020.05.22.20110668>
11. Gun Min Kim, Hei-Cheul Jeung, Sun Young Rha, Hyo Song Kim, Inkyung Jung, et al. A Randomized Phase II Trial of S-1-oxaliplatin Versus

Capecitabine-Oxaliplatin in Advanced Gastric Cancer. *Eur J Cancer*. 2012 Mar;48(4):518-26.

12. Y Yamada , K Higuchi , K Nishikawa , M Gotoh, N Fuse, et al. Phase III Study Comparing Oxaliplatin Plus S-1 With Cisplatin Plus S-1 in chemotherapy-naïve Patients With Advanced Gastric Cancer. *Ann Oncol*. 2015 Jan; 26(1):141-8.

13. Hironaga Satake, Akira Miki , Masato Kondo, Takeshi Kotake , Yoshihiro Okita, et al. Phase I study of neoadjuvant chemotherapy with S-1 and oxaliplatin for locally advanced gastric cancer (Neo G-SOX PI). *ESMO Open*. 2017 Mar 9;2(1):e000130

14. Ji J, Shen L, Li Z, et al. LBA42 Perioperative chemotherapy of oxaliplatin combined with S-1 (SOX) versus postoperative chemotherapy of SOX or oxaliplatin with capecitabine (XELOX) in locally advanced gastric adenocarcinoma with D2 gastrectomy: a randomized phase III trial (RESOLVE trial), *Ann Oncol* 2019,26 Suppl 4:S29-S30

15. L Chen, Z Xu, J Ji, et al. The randomized, multicenter, controlled evaluation of S-1 and oxaliplatin (SOX) as neoadjuvant chemotherapy for Chinese advanced gastric cancer patients (RESONANCE trial) . *J clin Oncol* , 2020 ASCO Annual Meeting

16. Becker K, Mueller JD, Schulmacher C, Ott K, Fink U, et al. Histomorphology and Grading of Regression in Gastric Carcinoma Treated With Neoadjuvant Chemotherapy. *Cancer*. 2003 Oct 1;98(7):1521-30.

17. G Tomasello<sup>1</sup>, F Petrelli<sup>2</sup>, M Ghidini<sup>1</sup>, E Pezzica<sup>3</sup>, R Passalacqua, et al. Tumor Regression Grade and Survival After Neoadjuvant Treatment in Gastro-Esophageal Cancer: A Meta-Analysis of 17 Published Studies. *Eur J Surg Oncol*. 2017 Sep;43(9):1607-1616.
18. Eisenhauer EA, Therasse P, Bogaerts J, Schwartz LH, Sargent D, et al. New response evaluation criteria in solid tumours: revised RECIST guideline (version 1.1). *Eur J Cancer*. 2009 Jan;45(2):228-47.
19. Japanese Gastric Cancer Association. Japanese gastric cancer treatment guidelines 2014 (ver. 4). *Gastric Cancer* (2017) 20:1–19
20. Wang KS, Ren YX, Ma ZJ, Li F, Cheng XC, et al. Docetaxel, oxaliplatin, leucovorin, and 5-fluorouracil (FLOT) as preoperative and postoperative chemotherapy compared with surgery followed by chemotherapy for patients with locally advanced gastric cancer: a propensity score-based analysis. *Cancer Manag Res*. 2019 Apr 10;11:3009-3020.

Table 1 Demographic data

| Parameter           |               | FLOT        | SOX         | P-Value |
|---------------------|---------------|-------------|-------------|---------|
| Sex                 | Male          | 29(72.5)    | 21(61.8)    | 0.326   |
|                     | Female        | 11(27.5)    | 13(38.2)    |         |
| Age (Years)         | Median        | 67          | 61          | 0.155   |
|                     | Range         | 27-76       | 34-80       |         |
| Body mass index     | Median        | 23.41       | 23.18       | 0.888   |
|                     | Range         | 15.69-29.48 | 17.31-27.82 |         |
| Tumor site (PP)     | Proximal      | 7(22.6)     | 7(29.2)     | 0.528   |
|                     | Proximal-body | 3(9.7)      | 1(4.2)      |         |
|                     | Body          | 7(22.6)     | 3(12.5)     |         |
|                     | Distal-body   | 6(19.4)     | 5(20.8)     |         |
|                     | Distal        | 8(25.8)     | 6(25.0)     |         |
|                     | Total         | 0           | 2(8.3)      |         |
| Resection type (PP) | Partial       | 13(41.9)    | 9(37.5)     | 0.739   |
|                     | Total         | 18(58.1)    | 15(62.5)    |         |

---

Analysis of intention to treat (ITT) population except otherwise indicated



## 2. Adverse effects

| Parameter                  |             | FLOT      | SOX       |
|----------------------------|-------------|-----------|-----------|
| WBC decreased              | Grade 0,1,2 | 30(96.8)  | 24(100.0) |
|                            | Grade 3,4   | 1(3.2)    | 0         |
| Neutrophil count decreased | Grade 0,1,2 | 29(93.5)  | 22(91.7)  |
|                            | Grade 3,4   | 2(6.5)    | 2(8.3)    |
| Febrile neutropenia        | Grade 0,1,2 | 31(100.0) | 23(95.8)  |
|                            | Grade 3,4   | 0         | 1(4.2)    |
| Anemia                     | Grade 0,1,2 | 27(87.1)  | 22(91.7)  |
|                            | Grade 3,4   | 4(12.9)   | 2(8.3)    |
| Platelet count decreased   | Grade 0,1,2 | 30(96.8)  | 24(100.0) |
|                            | Grade 3,4   | 1(3.2)    | 0         |
| Aminotrasferase increased  | Grade 0,1,2 | 30(96.8)  | 24(100.0) |
|                            | Grade 3,4   | 1(3.2)    | 0         |
| Nausea                     | Grade 0,1,2 | 30(96.8)  | 24(100.0) |
|                            | Grade 3,4   | 1(3.2)    | 0         |
| Vomiting                   | Grade 0,1,2 | 30(96.8)  | 24(100.0) |
|                            | Grade 3,4   | 1(3.2)    | 0         |
| Diarrhea                   | Grade 0,1,2 | 31(100.0) | 24(100.0) |
|                            | Grade 3,4   | 0         | 0         |
| Peripheral neuropathy      | Grade 0,1,2 | 31(100.0) | 24(100.0) |
|                            | Grade 3,4   | 0         | 0         |

---

|                |             |           |           |
|----------------|-------------|-----------|-----------|
| Fatigue        | Grade 0,1,2 | 31(100.0) | 24(100.0) |
|                | Grade 3,4   | 0         | 0         |
| Anorexia       | Grade 0,1,2 | 30(96.8)  | 24(100.0) |
|                | Grade 3,4   | 1(3.2)    | 0         |
| Oral mucositis | Grade 0,1,2 | 31(100.0) | 24(100.0) |
|                | Grade 3,4   | 0         | 0         |

---

Analysis of PP population except otherwise indicated

### 3. Comparison of CT results between Pre-NAC and Post-NAC

| Parameter                    |     | FLOT     | SOX      | P-value |
|------------------------------|-----|----------|----------|---------|
| Depth of invasion (Pre-NAC)  | T4A | 18(58.1) | 15(62.5) | 0.739   |
|                              | T4B | 13(41.9) | 9(37.5)  |         |
| Lymph node (Pre-NAC)         | N0  | 1(3.2)   | 3(12.5)  | 0.169   |
|                              | N1  | 4(12.9)  | 5(20.8)  |         |
|                              | N2  | 23(74.2) | 11(45.8) |         |
|                              | N3  | 3(9.7)   | 5(20.8)  |         |
| TNM stage (Pre-NAC)          | IIB | 1(3.2)   | 3(12.5)  | 0.422   |
|                              | III | 17(54.8) | 12(50.0) |         |
|                              | IVA | 13(41.9) | 9(37.5)  |         |
| Depth of invasion (Post-NAC) | T1  | 1(3.2)   | 1(4.2)   | 0.430   |
|                              | T2  | 9(29.0)  | 10(41.7) |         |
|                              | T3  | 13(41.9) | 5(20.8)  |         |
|                              | T4A | 8(25.8)  | 8(33.3)  |         |
| Lymph node (Post-NAC)        | N0  | 4(12.9)  | 7(29.2)  | 0.227   |
|                              | N1  | 12(38.7) | 9(37.5)  |         |
|                              | N2  | 15(48.4) | 7(29.2)  |         |
|                              | N3  | 0        | 1(4.2)   |         |
| TNM stage (Post-NAC)         | I   | 3(9.7)   | 5(20.8)  | 0.444   |
|                              | IIA | 7(22.6)  | 6(25.0)  |         |
|                              | IIB | 1(3.2)   | 2(8.3)   |         |

---

|                                        |     |          |          |       |
|----------------------------------------|-----|----------|----------|-------|
|                                        | III | 20(64.5) | 11(45.8) |       |
| Response rate                          | PR  | 22(71.0) | 14(58.3) | 0.618 |
|                                        | SD  | 8(25.8)  | 9(37.5)  |       |
|                                        | PD  | 1(3.2)   | 1(4.2)   |       |
| Overall response rate (ITT population) |     | 22(55.0) | 14(41.2) | 0.236 |
| Disease control rate (ITT population)  |     | 30(75.0) | 23(67.6) | 0.484 |

---

Analysis of PP population except otherwise indicated

#### 4. Comparison of postoperative pathological results between two groups

| Parameter               |                | FLOT      | SOX       | P-value |
|-------------------------|----------------|-----------|-----------|---------|
| Lauren's classification | Intestinal     | 18 (58.1) | 13(54.2)  | 0.314   |
|                         | Diffuse        | 7 (22.6)  | 6 (25.0)  |         |
|                         | Mixed          | 3 (9.7)   | 5 (20.8)  |         |
|                         | Unclassifiable | 3 (9.7)   | 0         |         |
| Resection               | R0             | 27(87.1)  | 24(100.0) | 0.123   |
|                         | R1             | 4(12.9)   | 0         |         |
| Nerve invasion          | Negative       | 16(51.6)  | 14(58.3)  | 0.620   |
|                         | Positive       | 15(48.4)  | 10(41.7)  |         |
| Vessels invasion        | Negative       | 25(80.6)  | 17(70.8)  | 0.396   |
|                         | Positive       | 6(19.4)   | 7(29.2)   |         |
| Tumor                   | Unclassifiable | 1(3.2)    | 0         | 0.856   |
|                         | T1A            | 1(3.2)    | 1(4.2)    |         |
|                         | T1B            | 1(3.2)    | 1(4.2)    |         |
|                         | T2             | 2(6.5)    | 3(12.5)   |         |
|                         | T3             | 19(61.3)  | 16(66.7)  |         |
|                         | T4A            | 6(19.4)   | 2(8.3)    |         |
|                         | T4B            | 1(3.2)    | 1(4.2)    |         |
|                         |                |           |           |         |
| Lymph node              | N0             | 10(32.3)  | 9(37.5)   | 0.661   |
|                         | N1             | 4(12.9)   | 3(12.5)   |         |
|                         | N2             | 10(32.3)  | 5(20.8)   |         |

|                            |           |    |          |          |       |
|----------------------------|-----------|----|----------|----------|-------|
|                            | N3A       |    | 6(19.4)  | 4(16.7)  |       |
|                            | N3B       |    | 1(3.2)   | 3(12.5)  |       |
| YpTNM                      | I         |    | 3(9.7)   | 3(12.5)  | 0.799 |
|                            | II        |    | 11(35.5) | 10(41.7) |       |
|                            | III       |    | 17(54.8) | 11(45.8) |       |
| TRG                        | 1A        |    | 1(3.2)   | 0        | 0.277 |
|                            | 1B        |    | 7(22.6)  | 11(45.8) |       |
|                            | 2         |    | 13(41.9) | 7(29.2)  |       |
|                            | 3         |    | 10(32.3) | 6(25.0)  |       |
| Pathological regression in | Complete  | or | 8(20)    | 11(32.4) | 0.225 |
| ITT                        | sub-total |    |          |          |       |

Analysis of PP population except otherwise indicated

5. Table Postoperative complications PP population

| Complication                 | Number of patients |         | p value |
|------------------------------|--------------------|---------|---------|
|                              | FLOT               | SOX     |         |
| Overall complications        | 9(29.0)            | 8(33.3) | 0.732   |
| Abdominal complication       | 7(22.6)            | 5(20.8) | 0.876   |
| Intra-abdominal hemorrhage   | 0                  | 1(4.2)  | 0.436   |
| Superficial wound dehiscence | 0                  | 1(4.2)  | 0.436   |
| Pulmonary Infection          | 2(6.5)             | 1(4.2)  | 1.000   |
| Abdominal Infection          | 4(12.9)            | 2(8.3)  | 0.686   |
| Anastomotic leakage          | 2(6.5)             | 1(4.2)  | 1.000   |
| Pancreatic fistula           | 0                  | 1(4.2)  | 0.436   |
| Impaired renal function      | 1(3.2)             | 0       | 1.000   |
| Cardiac/respiratory failure  | 0                  | 1(4.2)  | 0.436   |
| Readmission                  | 1(3.2)             | 1(4.2)  | 1.000   |
| Reoperation                  | 0                  | 1(4.2)  | 0.436   |
| Death                        | 0                  | 0       | NA      |

Analysis of PP population except otherwise indicated

Table 6 Complete or sub-total tumor regression

| Stage type | Stage | Complete or sub-total tumor regression |             |         |
|------------|-------|----------------------------------------|-------------|---------|
|            |       | FLOT                                   | SOX         | P VALUE |
| cTNM       | IIB   | 1/1(100.0)                             | 1/3(33.3)   | NS      |
|            | III   | 5/17(29.0)                             | 6/12(50.0)  | NS      |
|            | IVA   | 2/13(15.4)                             | 4/9(44.4)   | NS      |
| ypTNM      | I     | 3/3(100.0)                             | 3/3(100.0)  | NS      |
|            | II    | 5/11(45.5)                             | 6/10 (60.0) | NS      |
|            | III   | 0/17                                   | 2/11(18.2)  | NS      |

---

Analysis of PP population except otherwise indicated

cTNM: Pre-treatment clinical TNM stage;

ypTNM: Postoperative pathological TNM stage



Fig. 1 CONSORT diagram

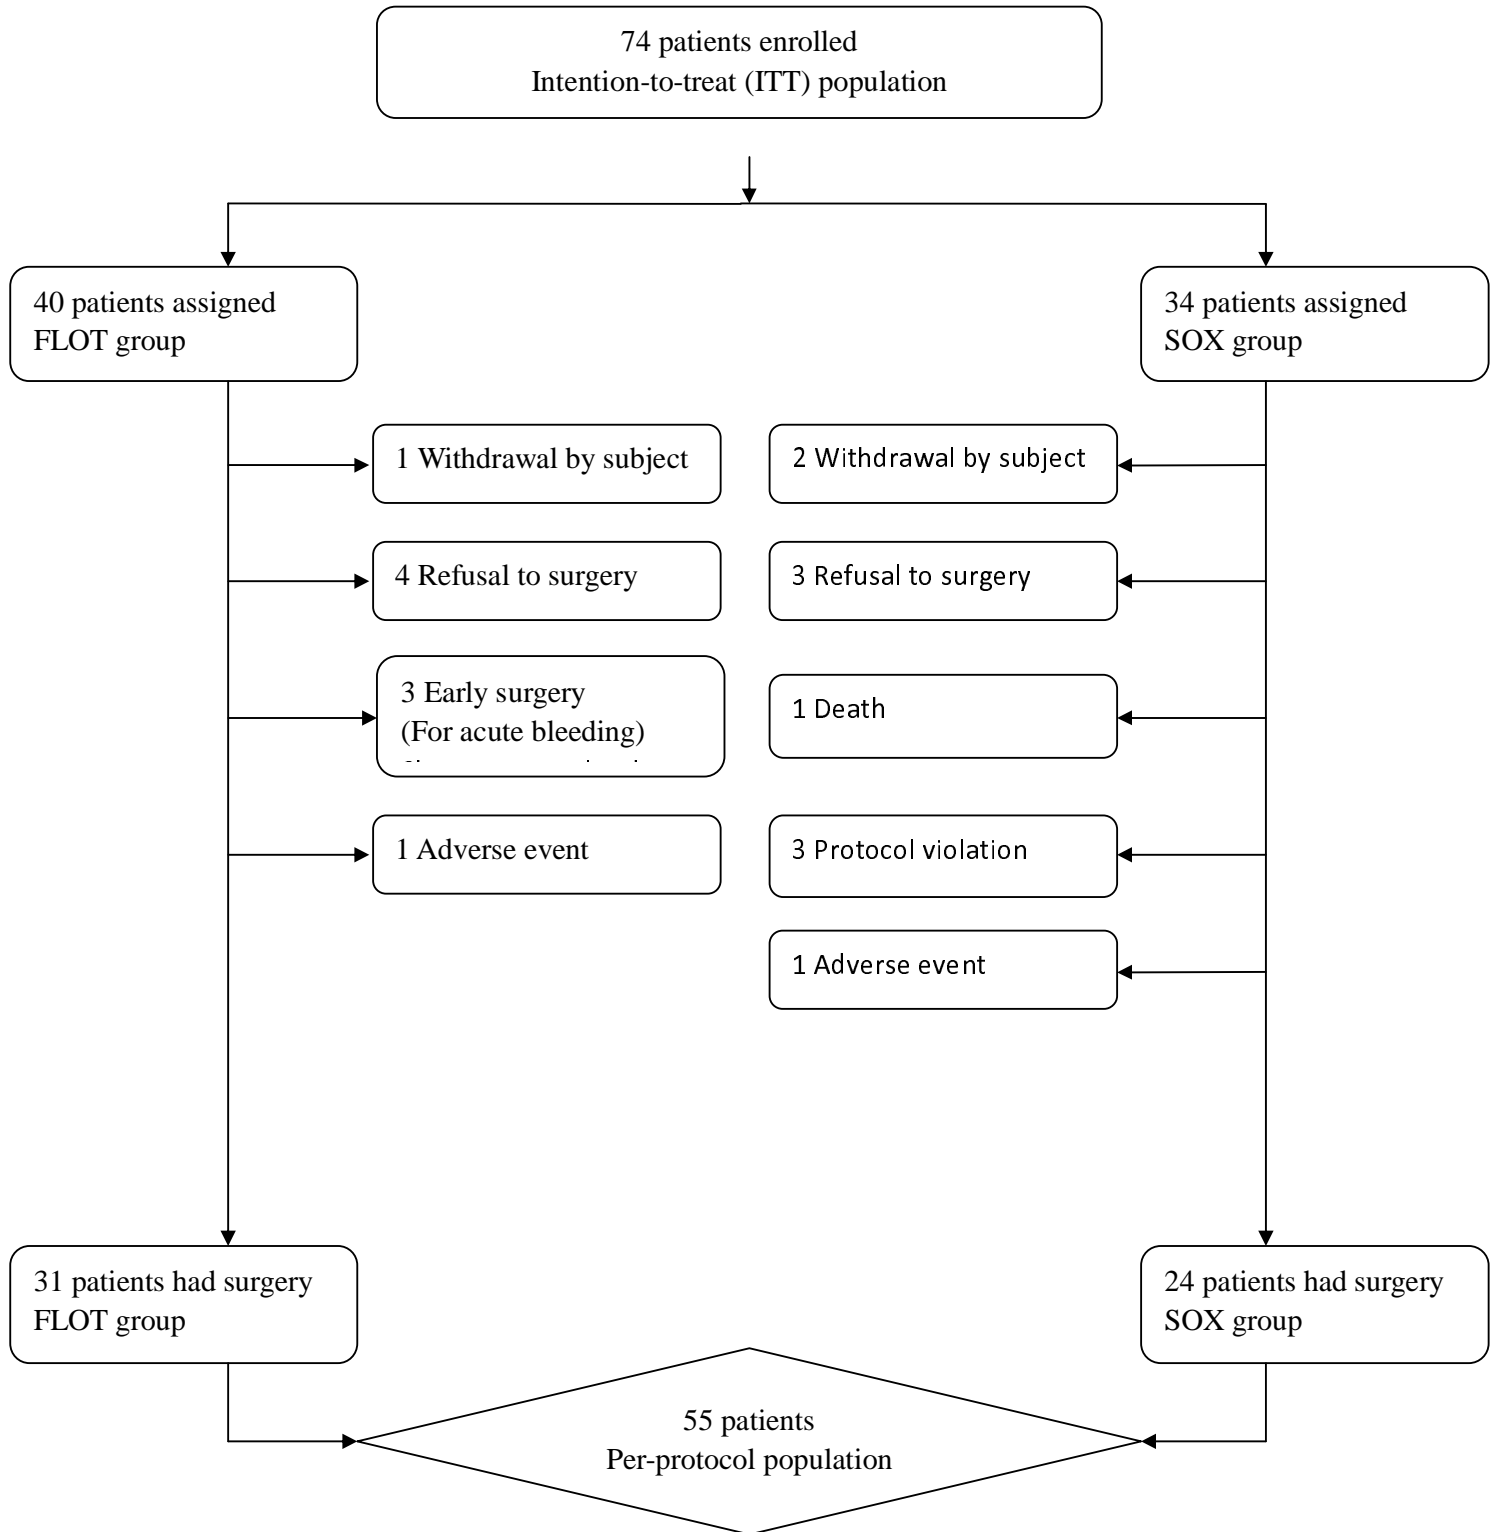

Source: https://www.medrxiv.org/content/10.1101/2020.06.21.20136887v3.full.pdf
